# Supplementary material for: Kyoto international consensus report on anatomy, pathophysiology and clinical significance of the gastro-oesophageal junction
Source: HighWire-hosted journal article supplement (doi:10.1136/gutjnl-2022-327281), 2022-06-20
Supplement: gutjnl-2022-327281supp002_data_supplement.pdf [file gutjnl-2022-327281supp002_data_supplement.pdf]

**Supplementary Table1A. Evidence Levels**

| <b>Evidence Level</b> | <b>Definition</b>                                                                                                                            |
|-----------------------|----------------------------------------------------------------------------------------------------------------------------------------------|
| <b>High</b>           | Further research is unlikely to change our confidence in the estimate of effect                                                              |
| <b>Moderate</b>       | Further research is likely to have an important impact to our confidence in the estimate of effect and may change the estimate               |
| <b>Low</b>            | Further research is very likely to have an important impact on our confidence in the estimate of effect and is likely to change the estimate |
| <b>Very Low</b>       | Any estimate of effects is very uncertain                                                                                                    |

**Supplementary Table1B. Strength of Recommendation**

| <b>Category of Recommendation</b> | <b>Definition</b>                                                                     |
|-----------------------------------|---------------------------------------------------------------------------------------|
| <b>Strong</b>                     | Most well-informed people would follow                                                |
| <b>Weak</b>                       | Majority of well-informed people would make but substantial minority would not follow |
| <b>Not Applicable</b>             | Not applicable for recommendation                                                     |
